# Supplementary material for: Molecular mechanisms of the antibacterial activity of polyimide fibers in a skin-wound model with Gram-positive and Gram-negative bacterial infection in vivo
Source: Royal Society of Chemistry journal article supplement (doi:10.1039/d2na00221c), 2022-01-01
Supplement: d2na00221c1.pdf [file d2na00221c1.pdf]

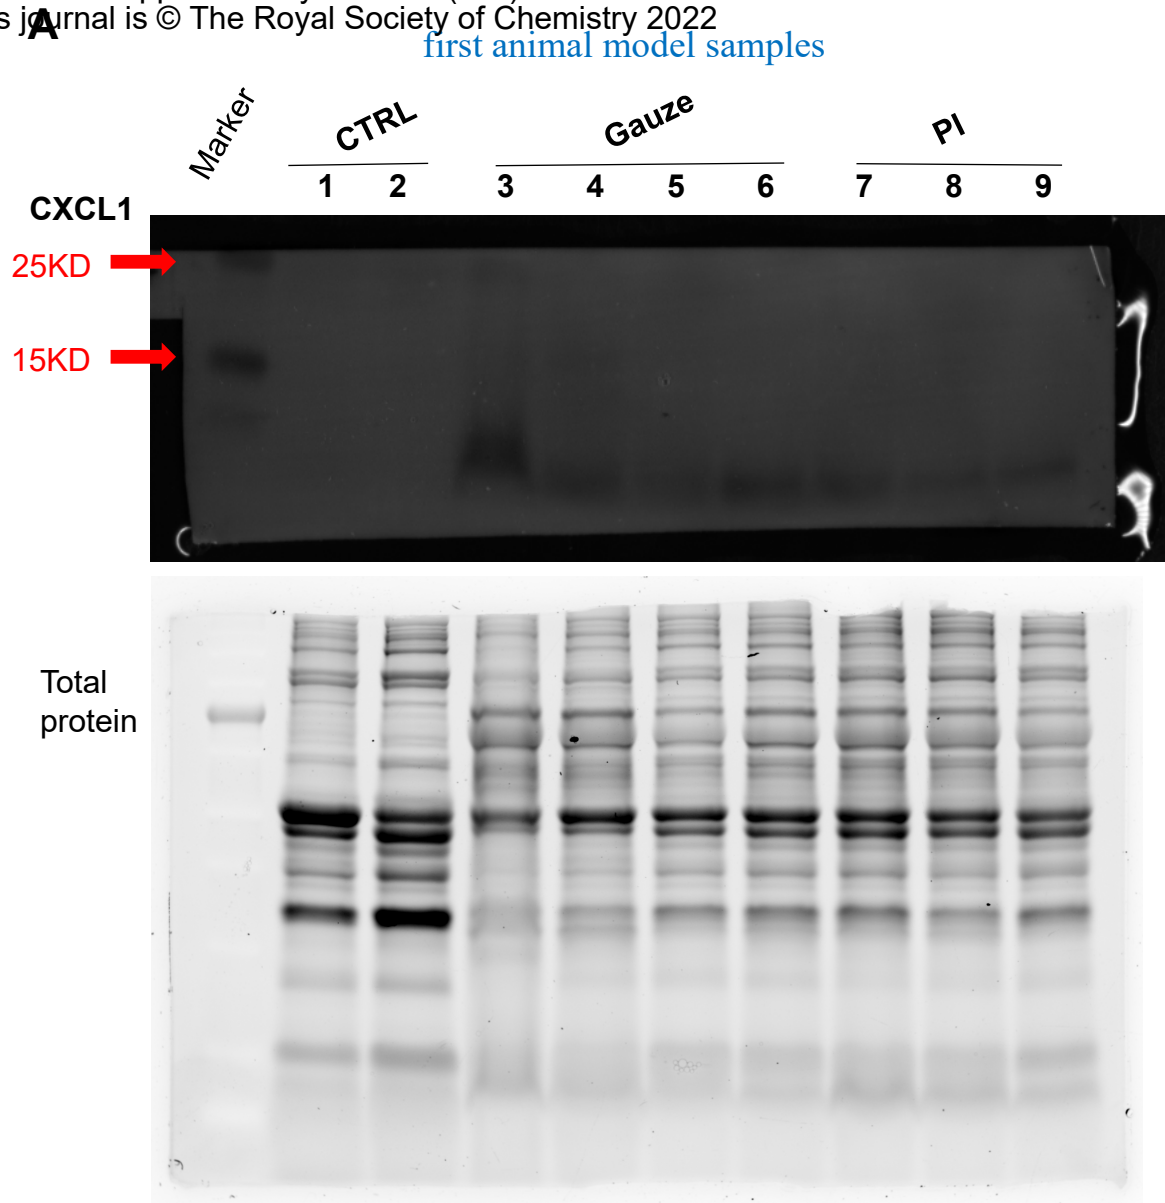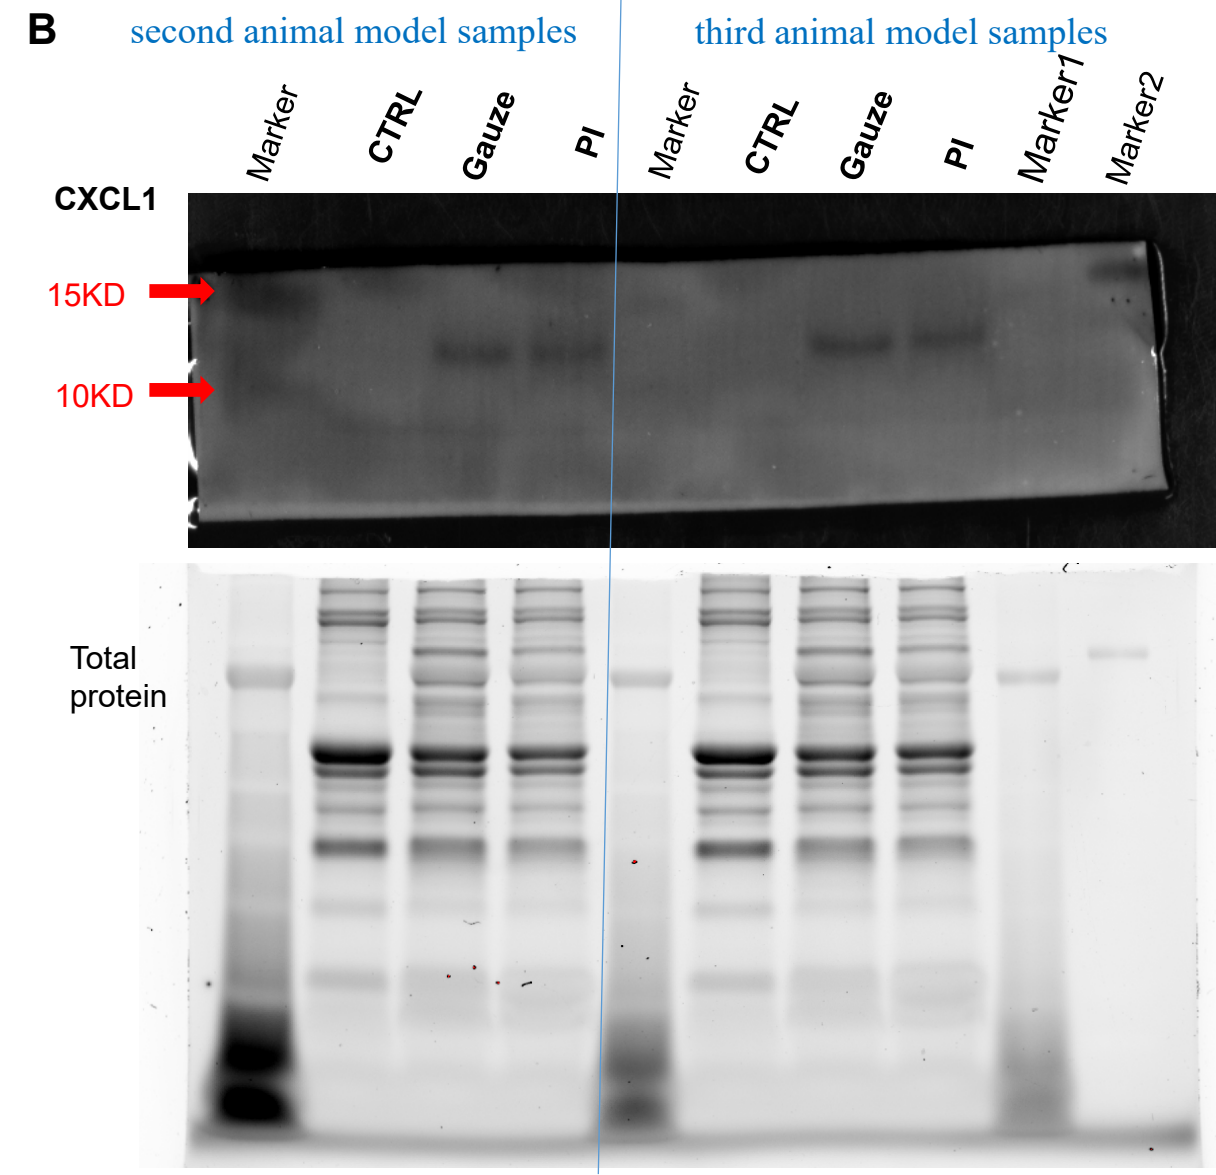

Western blotting analysis of CXCL1 in muscle cells from each group mice. (A) The western blotting result of the first animal model samples; the samples from control mice (1,2);the samples from gauze treated model mice (3-6);the samples from PI treated model mice (7-9); (B) The western blotting results of the second and third animal model samples.
